# Supplementary material for: High EMT Signature Score of Invasive Non-Small Cell Lung Cancer (NSCLC) Cells Correlates with NFκB Driven Colony-Stimulating Factor 2 (CSF2/GM-CSF) Secretion by Neighboring Stromal Fibroblasts
Source: PLoS One. 2015 Apr 28;10(4):e0124283. doi: 10.1371/journal.pone.0124283 (PMC4412534; doi:10.1371/journal.pone.0124283)
Supplement: S4 Table — Statistical analysis was performed on the mean values by unpaired comparison using Student’s t-test. p-values are shown for non-invasive NCI-H1437 co-cultures and invasive Calu-1 co-cultures. (XLSX) [file pone.0124283.s014.xlsx]

## Sheet: Tabelle1
Tumor Cells (TC)	Method	Gene	NF1 vs.TC+NF1	CAF1 vs. TC+CAF1	NF2 vs. TC+NF2	CAF2 vs. TC+CAF2	HDF vs. TC+HDF	TC vs. TC+NF1	TC vs. TC+CAF1	TC vs. TC+NF2	TC vs. TC+CAF2	TC vs. TC+HDF
NCI-H1437	AbArray	CSF2	n.s.	**	n.s.	n.s.	n.s.	n.s.	n.s.	n.s.	n.s.	n.s.
NCI-H1437	AbArray	CXCL1	**	**	**	**	*	***	n.s.	****	n.s.	n.s.
NCI-H1437	AbArray	IL6	**	**	**	**	n.s.	****	****	****	****	n.s.
NCI-H1437	AbArray	IL8	*	**	**	***	**	**	n.s.	n.s.	n.s.	n.s.
NCI-H1437	AbArray	CCL2	***	**	n.s.	n.s.	n.s.	**	n.s.	n.s.	n.s.	n.s.
NCI-H1437	AbArray	RANTES	n.s.	n.s.	n.s.	n.s.	n.s.	*	n.s.	n.s.	n.s.	n.s.
NCI-H1437	AbArray	MIF	n.s.	n.s.	**	**	n.s.	**	**	*	n.s.	n.s.
NCI-H1437	AbArray	SERPINE1	**	*	**	**	n.s.	****	****	****	****	****
NCI-H1437	ELISA	CSF2	n.s.	n.s.	n.s.	n.s.	**	n.s.	n.s.	n.s.	n.s.	n.s.
NCI-H1437	ELISA	CXCL1	****	****	****	****	****	n.s.	**	**	****	****
NCI-H1437	ELISA	IL6	**	****	****	****	****	****	****	****	****	****
NCI-H1437	ELISA	IL8	****	****	**	****	****	**	*	n.s.	n.s.	n.s.
NCI-H1437	ELISA	CXCL6	****	****	****	***	****	****	****	****	****	****
NCI-H1437	ELISA	VEGF	****	****	****	****	****	**	n.s.	n.s.	n.s.	*
Calu-1	AbArray	CSF2	***	**	**	**	****	****	****	***	***	****
Calu-1	AbArray	CXCL1	***	*	**	**	****	****	****	****	n.s.	****
Calu-1	AbArray	IL6	**	*	**	**	****	****	****	****	****	****
Calu-1	AbArray	IL8	**	**	*	***	****	****	****	****	n.s.	****
Calu-1	AbArray	CCL2	***	*	*	n.s.	***	****	**	n.s.	n.s.	****
Calu-1	AbArray	RANTES	**	*	n.s.	*	**	****	****	n.s.	n.s.	**
Calu-1	AbArray	MIF	*	*	n.s.	***	n.s.	****	****	n.s.	n.s.	n.s.
Calu-1	AbArray	SERPINE1	*	n.s.	*	**	n.s.	n.s.	*	n.s.	n.s.	n.s.
Calu-1	ELISA	CSF2	****	****	****	****	****	****	****	****	****	****
Calu-1	ELISA	CXCL1	****	****	****	****	****	****	****	****	****	****
Calu-1	ELISA	IL6	n.s.	****	****	****	****	****	****	****	****	****
Calu-1	ELISA	IL8	****	****	***	****	****	****	****	****	****	****
Calu-1	ELISA	CXCL6	n.s.	****	****	n.s.	***	****	****	****	**	****
Calu-1	ELISA	VEGF	****	****	****	****	****	****	****	****	****	n.s.
